# Supplementary material
Source: HighWire-hosted journal article supplement (https://jama.ama-assn.org/content/suppl/2005/10/07/294.9.1172)

# Pacientes estandarizados

Los **pacientes estandarizados** son actores que han recibido formación y, durante una entrevista y exploración física con un estudiante de medicina o un médico en formación, representan el papel de pacientes. Hoy día, como parte de la educación médica, con frecuencia muchas facultades de medicina utilizan a estos “pacientes” para representar interacciones con pacientes así como presentaciones realistas de enfermedades. Estos pacientes estandarizados hablan de sus síntomas con el estudiante y éste, a su vez, efectúa una entrevista con el paciente y, acto seguido, una exploración física. A través de estas entrevistas, los estudiantes aprenden a comunicarse con los pacientes en una situación que no requiere el uso de pacientes reales.

El número de *JAMA* correspondiente al 7 de septiembre de 2005 se dedica íntegramente a artículos sobre educación médica.

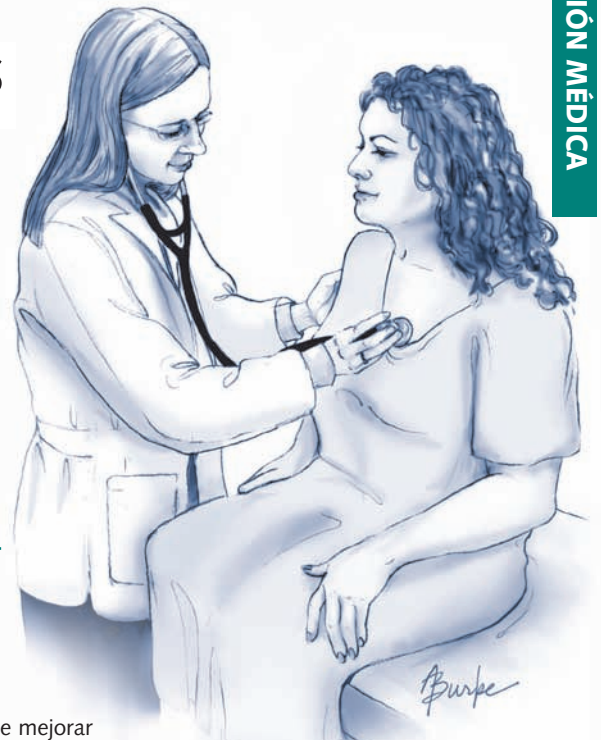

## APRENDIZAJE Y EVALUACIÓN DE LOS ESTUDIANTES DE MEDICINA

Las entrevistas con pacientes estandarizados son uno de los diversos métodos con que contamos para la enseñanza de las habilidades clínicas y para evaluar las aptitudes de los estudiantes de medicina y médicos en formación. Estas interacciones simuladas ayudan a los estudiantes a identificar los **signos** (anomalías objetivas) y los **síntomas** (experiencias subjetivas del paciente) de una enfermedad particular. El estudiante puede mejorar sus habilidades de exploración física con el objetivo de contribuir a establecer un diagnóstico preciso. Además, los pacientes estandarizados proceden de distintos orígenes y exponen a los estudiantes a importantes problemas culturales. De este modo, el estudiante de medicina puede aprender cómo identificar y comprender el impacto físico, emocional, social y cultural que tiene una enfermedad.

En general, los pacientes estandarizados tienen formación para valorar las habilidades como entrevistador y exploratorias del estudiante con el que interactúan. Además, un profesor con experiencia puede observar la entrevista y la exploración física con la finalidad de evaluar las habilidades clínicas y recomendar los aspectos que requieren una mejora. En la actualidad, en Estados Unidos, para llegar a ser un médico en ejercicio, como parte de los exámenes para obtener el título de licenciado en medicina, se exige a los estudiantes que aprueben una evaluación de habilidades clínicas con pacientes estandarizados.

## MANIQUÉS COMO PACIENTES

Además de actores de carne y hueso, para representar a pacientes también pueden usarse maniqués informatizados. Utilizando dispositivos de alta tecnología, estos **maniqués-pacientes** de tamaño natural simulan el cuerpo humano y permiten que los estudiantes auscultan los ruidos respiratorios y cardíacos, palpén los pulsos, determinen los signos vitales y muchas cosas más. Los estudiantes también pueden practicar intervenciones médicas, caso de la **intubación** (inserción de un tubo para respirar en las vías respiratorias), inyecciones de medicamentos y **reanimación cardiopulmonar (RCP)** (un procedimiento para restablecer la respiración y la circulación). Estas técnicas ayudan a los estudiantes a responder con rapidez y precisión a las situaciones que crea una enfermedad aguda antes de afrontarlas en pacientes reales. Los maniqués también les permiten practicar diversos actos médicos antes de hacerlo en pacientes de verdad.

Fuentes: Association of American Medical Colleges y National Board of Medical Examiners.

## PARA MÁS INFORMACIÓN

- Association of American Medical Colleges  
[www.aamc.org](http://www.aamc.org)
- National Board of Medical Examiners  
[www.nbme.org](http://www.nbme.org)

## PARA SU PROPIA INFORMACIÓN

Para localizar esta “Página de *JAMA* para el Paciente” u otras previas, acceda al índice de la “Página para el Paciente” en la web de *JAMA* ([www.jama.com](http://www.jama.com)). Las “Páginas de *JAMA* para el Paciente” están disponibles en inglés y en español. En el número de *JAMA* correspondiente al 6 de septiembre de 2002 se publicó una “Página para el Paciente” sobre educación médica; en el del 4 de septiembre de 2002 acerca de educación médica continuada; en el del 3 de septiembre de 2003 sobre especialidades médicas, y en el de 1 de septiembre de 2004 acerca de centros sanitarios académicos.

Redactora: Erin Brender, MD

Ilustradora: Alison Burke, MA,

Editor: Richard M. Glass, MD

La “Página de *JAMA* para el Paciente” es un servicio público de la revista *JAMA*. La información y recomendaciones que aparecen en esta página son adecuadas en la mayoría de los casos, pero no constituyen el sustituto de un diagnóstico médico. Para una información más específica sobre su caso particular, la revista *JAMA* le sugiere que consulte con su médico. Los médicos y otros profesionales de asistencia sanitaria pueden reproducir esta página sin fines comerciales y facilitarla a los pacientes. Cualquier otro tipo de reproducción debe someterse a la aprobación de la AMA. Para adquirir separatas, pueden ponerse en contacto con el teléfono +718/946-7424.

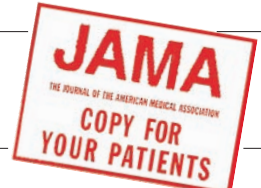

Supplement: pdfpat090705.pdf [file pdfpat090705.pdf]
